# Supplementary material
Source: HighWire-hosted journal article supplement (https://bmjopen.bmj.com/content/7/4/e015906)
Supplement: inline-supplementary-material-1 [file inline-supplementary-material-1.pdf]

## Appendix

The following search terms were used:

### MEDLINE

exp Femoral fractures/ or exp Hip Fractures/ or exp Femoral Neck Fractures/

(fract\* adj6 (femor\* or neck or hip)).mp.

exp fluid therapy/

(fluid volume optimizat\* or fluid volume optimisat\*).mp. [mp=title, abstract, heading word, drug trade name, original title, device manufacturer, drug manufacturer, device trade name, keyword]

(fluid adj3 therap\*).mp. [mp=title, abstract, heading word, drug trade name, original title, device manufacturer, drug manufacturer, device trade name, keyword]

(fluid adj3 volume).mp. [mp=title, abstract, heading word, drug trade name, original title, device manufacturer, drug manufacturer, device trade name, keyword]

exp Infusions, Intravenous/

((fluid\* or volume or plasma or blood or rehydrat\*) adj3 (replace\* or therap\* or substitut\* or restorat\* or resuscitat\* or administrat\* or replac\* or therap\* or solution\* or substitut\* or restor\* or resuscitat\* or rehydrat\* or challenge or perfusion or intravenous or shock)).ab,ti.

((Blood adj1 substitut\*) or (blood adj1 expan\*) or (plasma adj1 volume adj1 expan\*)).mp. or (volume adj1 expan\*).ab,ti. [mp=title, abstract, heading word, drug trade name, original title, device manufacturer, drug manufacturer, device trade name, keyword]

\*plasma volume/

exp fluid resuscitation/

1 or 2

3 or 4 or 5 or 6 or 7 or 8 or 9 or 10 or 11

12 and 13

limit 14 to exclude medline journals

limit 15 to (human)

## EMBASE

exp Femoral fractures/ or exp Hip Fractures/ or exp Femoral Neck Fractures/

(fract\* adj6 (femor\* or neck or hip)).mp.

exp fluid therapy/

(fluid volume optimizat\* or fluid volume optimisat\*).mp. [mp=title, abstract, heading word, drug trade name, original title, device manufacturer, drug manufacturer, device trade name, keyword]

(fluid adj3 therap\*).mp. [mp=title, abstract, heading word, drug trade name, original title, device manufacturer, drug manufacturer, device trade name, keyword]

(fluid adj3 volume).mp. [mp=title, abstract, heading word, drug trade name, original title, device manufacturer, drug manufacturer, device trade name, keyword]

exp Infusions, Intravenous/

((fluid\* or volume or plasma or blood or rehydrat\*) adj3 (replace\* or therap\* or substitut\* or restorat\* or resuscitat\* or administrat\* or replac\* or therap\* or solution\* or substitut\* or restor\* or resuscitat\* or rehydrat\* or challenge or perfusion or intravenous or shock)).ab,ti.

((Blood adj1 substitut\*) or (blood adj1 expan\*) or (plasma adj1 volume adj1 expan\*)).mp. or (volume adj1 expan\*).ab,ti. [mp=title, abstract, heading word, drug trade name, original title, device manufacturer, drug manufacturer, device trade name, keyword]

\*plasma volume/

exp fluid resuscitation/

1 or 2

3 or 4 or 5 or 6 or 7 or 8 or 9 or 10 or 11

12 and 13

limit 14 to exclude medline journals

limit 15 to (human)
